# Supplementary material for: Determinants of laminin polymerization revealed by the structure of the α5 chain amino-terminal region
Source: PubMed Central journal article supplement — EMBO Rep. 2011 Feb 11;12(3):276–82. doi: 10.1038/embor.2011.3 (PMC3059903; doi:10.1038/embor.2011.3), 2011-02-11
Supplement: embor20113s1.pdf [file embor20113s1.pdf]

## **SUPPLEMENTARY INFORMATION**

### **Determinants of laminin polymerization revealed by the structure of the $\alpha 5$ chain amino-terminal region**

Sadaf-Ahmahni Hussain<sup>1</sup>, Federico Carafoli<sup>1</sup> & Erhard Hohenester<sup>1</sup>

<sup>1</sup>Department of Life Sciences, Imperial College London, London SW7 2AZ, UK

**Supplementary Fig S1.** Comparison of  $\alpha$ 5LN to galactose binding domains. (A)

Superposition of laminin  $\alpha$ 5LN (pale blue) and the GBD of *Clostridium perfringens* NanJ (PDB entry 2v72, magenta). The r.m.s. deviation of 130 matched C $\alpha$  atoms is 2.2 Å. A calcium ion in NanJ is shown as a sphere. The chain break in the  $\alpha$ 5LN structure is labelled. (B) Structure of the calcium binding site in NanJ. Calcium ligands are shown in atomic detail and calcium-ligand bonds are indicated by black lines. (C) Region of  $\alpha$ 5LN corresponding to the NanJ calcium site. Selected residues are shown in atomic detail and hydrogen bonds are indicated by dashed lines. (D) Intrinsic fluorescence spectra of  $\alpha$ 5LN-LEa1-2 in the presence and absence of calcium. The solutions contained 4  $\mu$ M protein in 20 mM Na-HEPES pH 7.5, 150 mM NaCl, and either 2 mM CaCl<sub>2</sub> (black line) or 5 mM EDTA (red line). The spectra were recorded using a Jobin Yvon Horiba FluoroMax-3 fluorimeter at an excitation wavelength of 290 nm.

**Supplementary Fig S2.** Laminin  $\alpha$ 5LN-LEa1 interface. (A) Details of the  $\alpha$ 5LN-LEa1 interface in a view direction similar to **Fig 1B**. The LN, LEa1 and LEa2 domains are in pale blue, green and pink, respectively. Disulphide bridges and N-linked glycans are in yellow and magenta, respectively. Selected residues are shown in atomic detail. The side chain of Pro52 in the N-terminal segment is in orange. Three phosphate ions are shown with phosphorus atoms in green. Selected hydrogen bonds are indicated by dashed lines. (B) Another view of the  $\alpha$ 5LN-LEa1 interface rotated by  $\sim 180^\circ$  relative to the view in **A** showing the interactions made by the N-terminal segment. The LN domain is shown as a pale blue surface, and the LEa1 domain as a semi-transparent pale green surface. The N-terminal segment is shown in atomic detail, with Pro52 highlighted in orange.

**Supplementary Fig S3.** Sequence alignment of selected laminin  $\alpha$  chain LN domains: mouse and zebrafish  $\alpha 1$  and  $\alpha 5$ ; mouse  $\alpha 2$  and  $\alpha 3B$ ; *Drosophila melanogaster*  $\alpha 1/2$  (wing blister) and  $\alpha 3/5$  (LamA); *Caenorhabditis elegans*  $\alpha 1/2$  (lam-3) and  $\alpha 3/5$  (epi-1). Identical residues are shaded yellow. Asparagine residues that are predicted to be modified by *N*-linked glycosylation are in magenta. The sequence numbering of the mouse laminin  $\alpha 5$  chain is shown above the alignment.

**Supplementary Table S1.** Summary of laminin short arm constructs.

| <b>Construct</b>    | <b>UniProt reference</b> | <b>Residues<sup>a</sup></b> | <b>Expression<sup>b</sup></b> | <b>Monodisperse protein<sup>c</sup></b> |
|---------------------|--------------------------|-----------------------------|-------------------------------|-----------------------------------------|
| $\alpha$ 1LN-LEa1-2 | P19137                   | 25-403                      | Yes                           | Yes                                     |
| $\alpha$ 1LN-LEa1-4 | P19137                   | 25-509                      | Yes                           | Yes                                     |
| $\alpha$ 2LN-LEa1-2 | Q60675                   | 29-409                      | Yes                           | Yes                                     |
| $\alpha$ 2LN-LEa1-4 | Q60675                   | 29-513                      | Yes                           | Yes                                     |
| $\alpha$ 5LN-LEa1-2 | Q61001                   | 44-433                      | Yes                           | Yes                                     |
| $\alpha$ 5LN-LEa1-4 | Q61001                   | 44-546                      | Yes                           | Yes                                     |
| $\beta$ 1LN-LEa1-2  | P02469                   | 22-397                      | No                            |                                         |
| $\beta$ 1LN-LEa1-4  | P02469                   | 22-509                      | Yes                           | No                                      |
| $\gamma$ 1LN-LEa1-2 | P02468                   | 34-395                      | Yes                           | Yes                                     |
| $\gamma$ 1LN-LEa1-4 | P02468                   | 34-492                      | Yes                           | Yes                                     |

<sup>a</sup>All mature proteins contain a vector-derived APLA sequence at the N-terminus and a AAAHHHHHH tag at the C-terminus.

<sup>b</sup>The criterion used is a yield of > 0.5 mg from 1 litre of conditioned cell culture medium.

<sup>c</sup>The criterion used is > 90% of protein eluting as a single symmetric peak from a S200 size exclusion chromatography column run in 20 mM Na-HEPES pH 7.5, 150 mM NaCl, 2 mM CaCl<sub>2</sub>.

# Supplementary Figure S1

Hussain et al.

A

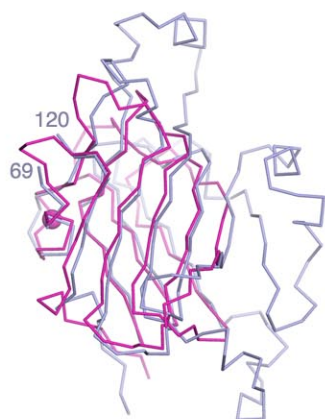

B

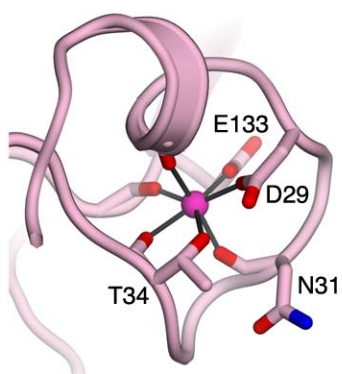

C

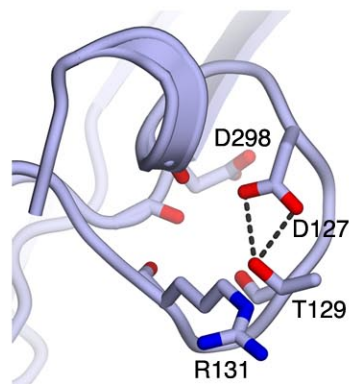

D

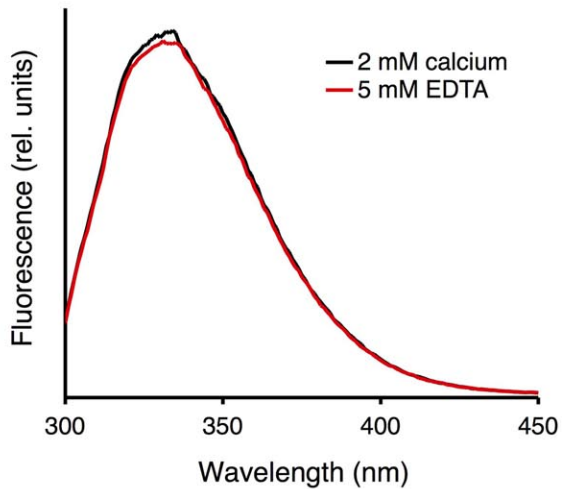

# Supplementary Figure S2

Hussain et al.

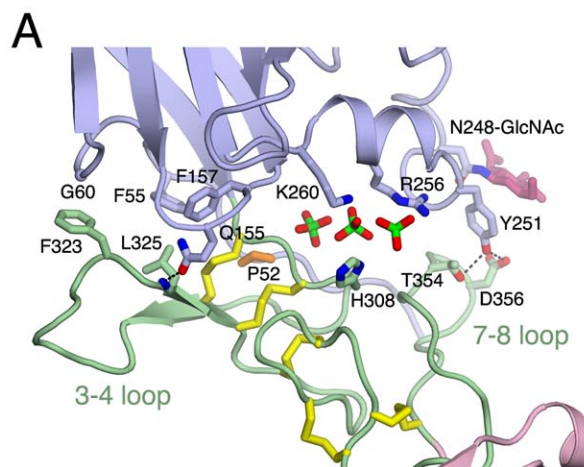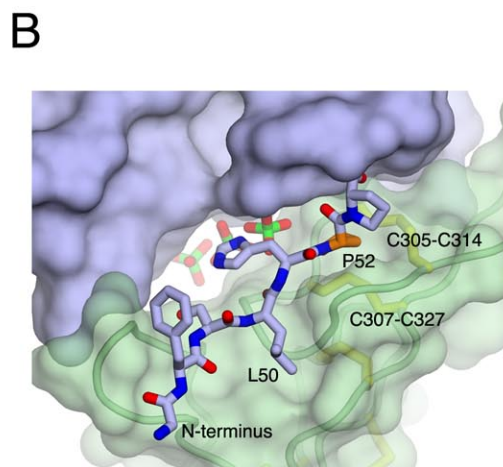

# Supplementary Figure S3

## Hussain et al.

```

50      60      70      80      90      100      110
LAMA5_MOUSE  FSLHPPYFNLAEGARITASATCGEEAPTRSVSRPPTEDLYCKLVGGPVAGGDPQTQCG----OYCDIC
LAMA3B_MOUSE RSLHPPYFNLAQAARIWATATCGERDPE--VSRPRPELFCKLVGGPAAQGS--GHTTQG----QFCDYC
LAMA5_DANRE  FSLHPPYFNLAEGTKITATATCGVDENE---QPIQDLYCKLVGGPVSG--DPSQTQG----OYCDIC
EPI1_CAEEEL  QVLTPTSQITTSRRKPIATATSCGEIQGQ----PVTEIYGLTGSTQYTPLNSYSYQDDEI17JGGHC
LAMA_DROME   AELTPPYFNLATGRKIIYATATCGQDQTDG-----PELYGKLVGANTEHDHIDYSVIQG----QVCDYC
LAMA1_MOUSE  RGLFPAILNLATNAHISANATCGEKGPE-----MFCKLVEHVPGRPVPR--HAQ-----CRVC
LAMA2_MOUSE  RGLFPFAVLNLSANALITTNATCGEKGPE-----MYCKLVEHVPGQPVR--NPO-----CRIC
LAMA1_DANRE  RGLFPAILNLSANAEISTTNATCGDPPDE-----MFCKLVEHVPGRRIR--NPO-----CRIC
LAMA3_CAEEEL RGLFPNIFNLATNSLITATDTCGQYTAE-----EYCKLVEHVLLRKTNTQSPQ-----CDIC
WB_DROME     GGLYPLPLFNVPVRAQISVNAATCGQNGAE-----EYCKQVQAKP-----CGIC

120      130      140      150      160      170
LAMA5_MOUSE  TAANS--NKAHPVSNADGTERWQWQSPPLSRGLSEYNEVVTLDLQGVFHVAYVLIKAFNSPRPDLWVLE
LAMA3B_MOUSE NSEDS--RKAHPASHAIDGSERWQWQSPPLSSGTQYNOVVTLDLQGLFHVAYVLIKAFNSPRPDLWVLE
LAMA5_DANRE  SSQDT--NRAHPIISNAIDGTERWQWQSPPLSRSAKHNOVVTLDLQGLFHVAYVLIKAFNSPRPDLWVLE
EPI1_CAEEEL  NAGN---ENSHFPAANMVDGNSWWMSPPLSRGLQHNEVVTITDLEQEFHVAYVVIQMANSPRPGSWVLE
LAMA_DROME   DPTVP--ERNHFPENAIIDGTEAWQWQSPPLSRGKHFNEVVTITNFEQEFHVAYLFIKMGNSPRPGLWVLE
LAMA1_MOUSE  DCHSTNPRRERHPIISHAIDCTNNWQWQSPSIQNGREYHVVTVTLDLQGVFOVAYIILKANAAPRGNWVLE
LAMA2_MOUSE  NQSSNPNYQRHPIITNAIDCKNTWQWQSPSIKNGRQPHWVTVTLDLQGVFOVAYIILKANAAPRGNWVLE
LAMA1_DANRE  DANSONPKQHPITNAIDCTNLWQWQSPSIKNGRQPHWVTVTLDLQGVFOVAYIILKANAAPRGNWVLE
LAMA3_CAEEEL DANN--VHKRHPITNAIDCTRRWQWQSPSLANGLRFEKVTITIDLRQYQVAYIILKMGNSPRPGLWVLE
WB_DROME     NAHS[14]SGSGSGSGSGFEEGWQWQSPTLQGGRQFEYVTILLDLKQTFQIFSVWLKSANSPRPAWVLE

180      190      200      210      220      230      240
LAMA5_MOUSE  RSTDFGHTYQPWFQFASSKRDCLERFGPRTLERIT--QDDVICTTEYSRIVPLENGEIVVSLVNGRPF
LAMA3B_MOUSE RSVDFGSTYSPWFQFAHSRRDCVEQFGQENMAIT--QDDQMLCVTEYSRIVPLENGEIVVSLVNGRPF
LAMA5_DANRE  RSIDFGKTYQPWFQFASSKRDCIERFGQRTIERIY--HDDVICTTEYSRIVPLENGEIVVSLVNGRPF
EPI1_CAEEEL  RSTDHGKTYQPWFNFAENAAECMRRFGMESLSPIS--EDDSVICTRTDMSASLPLENAEMVIRILEHRPF
LAMA_DROME   KSTDYGKWTWPWFQHSFSDTPADCETYFGKDTYKPIIT--RDDVICTTEYSKIVPLENGEIVVSLVNGRPF
LAMA1_MOUSE  RSLDD--VEYKWPQYHAVTDTECLTRYNIYPRTGPPSYAKDDEVICTSFYSKIHPLENGEIHHSLINGRPF
LAMA2_MOUSE  RSLDG--VNFQWPQFYAISDTECLTRYITPRIGPPTYKRDEVICTSYYSRLVPLENGEIHHSLINGRPF
LAMA1_DANRE  RSLDG--EYEPWPQYAMQDAECMRQFGIPATTGVPRFQKEDEVHCTSEYSKITPLENGEIHHSLINGRPF
LAMA3_CAEEEL RSLDG--INFEPWPQYGLSDADCQRWNLGQNGKVFVQDTEIICSTQFSKPGLENGVLSLKNRPF
WB_DROME     KSLDG--INFEPWPQYGLSDADCQRWNLGQNGKVFVQDTEIICSTQFSKPGLENGVLSLKNRPF

250      260      270      280      290      300
LAMA5_MOUSE  GALFYSYSPILRDFTKATNIRLRLRFLRNTLLGHLMGKALR----DPTVTRRYYSIKDISIGGR
LAMA3B_MOUSE GAKKFAFSDTLREFTKATNIRLRLRFLRNTLLGHLISKAER----DPTVTRRYYSIKDISVGGGR
LAMA5_DANRE  GAMFYSYSPVLRFTKATNIRLRLRFLRNTLLGHLMGKTLR----DPTVTRRYYSIKDISIGGR
EPI1_CAEEEL  SSRQFATSEALNFRATNVRRLRLRTRTLQGHLMMDNEWR----DPTVTRRYYSIAKIMIGGR
LAMA_DROME   SSTNYFISTVLOEWTRATNVRRLRLRTRTLQGHLMMSVARQ----DPTVTRRYYSIKDISIGGR
LAMA1_MOUSE  SAD--DPSPELLEFTSARYIRLRLRQIRTLNADLMTLSHRDLRDLDPVTRRYYSIKDISVGGM
LAMA2_MOUSE  SAD--DPSPELLEFTSARYIRLRLRQIRTLNADLMTLFAHRKDPREIDPVTTRRYYSVVKDISVGGM
LAMA1_DANRE  SAD--DLTPELLEFTSARYIRLRLRQIRTLNADLMTLSYRDKPVDVPTTRRYYSIKDISVGGM
LAMA3_CAEEEL GAE--NLSLELQKFTRARFVRLRLISPRTLNADLMIINKKS--DSLKDSVTMRYFYSISDISIGGQ
WB_DROME     GAT--DQSPLEMKFITTRYIRIRLQGMHSTANQDNSLDWLLD--SPSLKHSFYSLSQVLSVAR

```
