# Supplementary material for: Determinants of laminin polymerization revealed by the structure of the α5 chain amino-terminal region
Source: PubMed Central journal article supplement — EMBO Rep. 2011 Feb 11;12(3):276–82. doi: 10.1038/embor.2011.3 (PMC3059903; doi:10.1038/embor.2011.3), 2011-02-11
Supplement: embor20113s2.pdf [file embor20113s2.pdf]

Manuscript EMBOR-2010-34629

## **Determinants of laminin polymerisation revealed by the crystal structure of the 5 chain N-terminal region**

Sadaf-Ahmahni Hussain, Federico Carafoli, Erhard Hohenester

*Corresponding author: Erhard Hohenester, Imperial College London*

---

**Review timeline:**

Submission date:

07 December 2010

Accepted:

17 December 2010

---

**There are no peer-review process files available for this article.**
